# Supplementary material for: Shift current photovoltaic effect in a ferroelectric charge-transfer complex
Source: PubMed Central journal article supplement (PMC5561111; doi:10.1038/s41467-017-00250-y), 2017-08-17
Supplement: 41467_2017_250_MOESM1_ESM.pdf [file 41467_2017_250_MOESM1_ESM.pdf]

File name: Supplementary Information

Description: Supplementary figures and supplementary note 1.

File name: Peer Review File

Description:

## Supplementary Note 1:

### Temperature dependence of photocurrent and photovoltage

In this Supplementary information, we discuss the possible mechanism for temperature dependence of short-circuit photocurrent and open-circuit photovoltage under irradiation of CW light. Although we have not completely understood the temperature dependence of short-circuit photocurrent (Fig. 2c) and open-circuit photovoltage (Fig. 2d), here we first discuss the former on the basis of the data analysis and then discuss the latter with assuming an equivalent circuit.

Supplementary Figure 1 shows the data of short-circuit photocurrent as a function of temperature on a semi-logarithmic scale and their fitting to a thermionic emission model assuming the contact involves a Schottky barrier. The data are well fitted to the formula of

$$J = AT^2 \exp\left(-\frac{e\Phi_B}{kT}\right) \quad (1),$$

where  $e$  is the elementary charge,  $\Phi_B$  the barrier height,  $k$  the Boltzmann constant,  $T$  temperature, and  $A$  the Richardson constant, resulting in  $\Phi_B \sim 40$  meV. Considering its narrow bandgap of about 500 meV, the barrier height is within reasonable range. Therefore it is most likely that the short-circuit current is limited by the contact resistance due to a Schottky barrier.

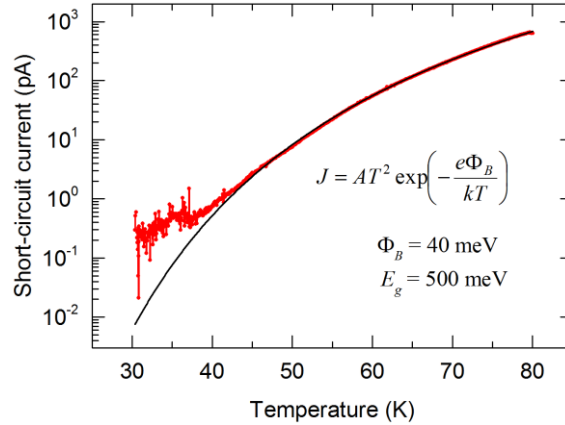

**Supplementary Figure 1** | Temperature dependence of short-circuit photocurrent on a semi-logarithmic scale. The black line is a result of the fitting by the thermionic emission model.

Having established a quasi-exponential temperature dependence of contact resistance, we now discuss the temperature dependence of the open-circuit photovoltage with assuming an equivalent circuit model. Supplementary Figure 2 displays the simplest equivalent circuit that may represent device condition during photovoltaic effect measurements, where  $I_{\text{shift}}$  is shift current which works as a current source,  $I_{\text{obs}}$  is an observed current,  $V$  is a voltage between two electrodes, and  $R_{\text{bulk}}^*$  and  $R_{\text{contact}}^*$  are bulk and contact resistances for photocurrent under illumination, respectively. These parameters are related by the following equation,

$$I_{\text{obs}} = \frac{1}{R_{\text{bulk}}^* + R_{\text{contact}}^*} V + \frac{R_{\text{bulk}}^*}{R_{\text{bulk}}^* + R_{\text{contact}}^*} I_{\text{shift}} \quad (2).$$

The open-circuit photovoltage (short-circuit photocurrent) is output voltage (current) when  $I_{\text{obs}} = 0$  ( $V = 0$ ). Then,  $V_{\text{OC}}$  and  $I_{\text{SC}}$  are given by

$$V_{\text{OC}} = -R_{\text{bulk}}^* I_{\text{shift}} \quad (3),$$

$$I_{\text{SC}} = \frac{R_{\text{bulk}}^*}{R_{\text{bulk}}^* + R_{\text{contact}}^*} I_{\text{shift}} \quad (4).$$

Suppose  $I_{\text{shift}}$  is temperature independent and  $R_{\text{bulk}}^* \ll R_{\text{contact}}^*$ , Eq. 4 implies that  $I_{\text{SC}}$  exponentially decays in low temperature as was shown in Supplementary Fig. 1, whereas Eq. 3 implies that  $V_{\text{OC}}$  is proportional to  $R_{\text{bulk}}^*$  which can have non-exponential temperature dependence.

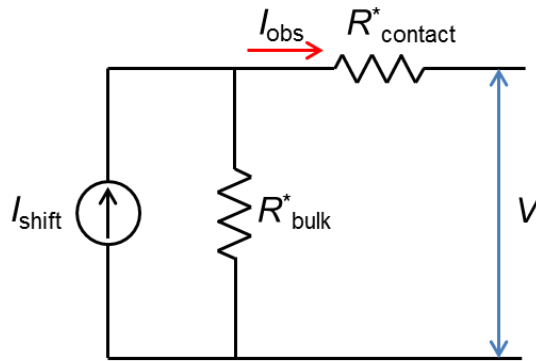

**Supplementary Figure 2** | An equivalent circuit for the sample condition during measurements of photovoltaic effect.
